# Supplementary material
Source: PubMed Central journal article supplement (PMC3690844)
Supplement: 1300460110_pnas.201300460SI.pdf [file 1300460110_pnas.201300460SI.pdf]

# Supporting Information

Park et al. 10.1073/pnas.1300460110

## SI Materials and Methods

**Molecular Biology.** The cDNA of AP-1  $\mu$ -adaptin 2 (*APIM2*) was obtained from the RIKEN Plant Science Center and isolated by PCR using primers APIM2-forward (F) and APIM2-reverse (R). Internal tags [myelocytomatosis viral oncogene homolog (*myc*) or 3 $\times$ HA (hemagglutinin)] were introduced by a PCR approach using the primers shown in Table S3. Each tagging site is shown in Fig. S1. *APIM2* with internal *myc* (*APIM2:myc*) was ligated to the binary vector (XbaI/blunt end) *pCsVI300* with cassava vein mosaic virus promoter (*pCsVMV*) to generate *pCsVMV::APIM2:myc*. For *APIM2<sub>pro::APIM2:3 $\times$ HA::APIM2<sub>3UTR</sub></sub>*, a binary plasmid containing *APIM2* cis-regulatory sequences was generated as follows: a genomic fragment corresponding to the 3' UTR region of *At1g60780* (approximately 0.3 kb) was PCR-amplified and subcloned into the *pGreenIIBASTA* plasmid (EcoRV/PstI). Next, a genomic fragment including the promoter and 5' UTR of *At1g60780* (approximately 1.5 kb) was PCR-amplified and further subcloned into the *pGreenIIBASTA::APIM2<sub>3UTR</sub>* plasmid (Acc65I/XhoI). PCR-amplified *APIM2:3 $\times$ HA* was inserted into the *pGreenIIBASTA::APIM2<sub>pro::APIM2<sub>3UTR</sub></sub>* plasmid (XhoI/EcoRV). For *35S::APIM1:3 $\times$ myc*, a *APIM1* genomic fragment was isolated from the *Arabidopsis thaliana* genome and followed by insertion of the three times repeated *myc* epitope (BamHI) (F. El Kasmi, M. Werner, and G.J., Entwicklungsgenetik, ZMBP, University of Tübingen, Tübingen, Germany). *APIM1:3 $\times$ myc* was subcloned into the 35S expression vector (SmaI/XbaI). For *GST: $\alpha$ -adaptin*, *HA: $\alpha$ -adaptin* (1) was blunted after digestion with Acc65I and further ligated to the SmaI-cleaved pGEX-5X-3 plasmid (GE Healthcare). For *GST: $\gamma$ -adaptin*,  *$\gamma$ -adaptin* was amplified by PCR using primers  $\gamma$ -F and  $\gamma$ -R and ligated to the pGEX-5X-1 (EcoRI/XhoI; GE Healthcare). For maltose-binding protein (*MBP*):*APIM2*, *APIM2* was PCR-amplified using primers APIM2-F2 and AP2M2-R2 and ligated to pMAL-c2X (BamHI/XbaI). For the list of primers used, see Table S3.

**Plant Material, Growth Condition, and Transformation.** *Arabidopsis thaliana*—ecotype *Columbia* (Col) or *Wassilewskija* (Ws)—plants were grown on soil or on Murashige and Skoog (MS) plates at 23 °C in continuous light. For protoplast preparation, *Arabidopsis thaliana* plants were grown on MS plates for 3 wk at 23 °C under long-day condition. Wild-type (WT) or heterozygous plants of either *ap1m2-1* [resistant to both kanamycin (KAN) and phosphinothricin (PPT); purchased from the Versailles Arabidopsis Stock Center] and/or *hap13* (resistant to phosphinothricin) (2) were transformed with *Agrobacterium tumefaciens*, using the floral-dip method (3). GFP-*ARA7* (4) and PIN-FORMED 2 (PIN2):GFP (5) transgenic plants were crossed with *APIM2::APIM2:3 $\times$ HA* transgenic plants or heterozygous plants of *ap1m2-1*.

**Genetic Analysis.** T1 plants grown on soil from bulk-harvested seeds were selected for transformants either with a 1:1,000 diluted BASTA (183 g/L glufosinate; AgrEvo) or with hygromycin (20 mg/L; Duchefa). Selected resistant plants were genotyped. PCR genotyping was as follows: for *ap1m2-1*, FLAG-LB4 and RP for a T-DNA insertion, amplifying a 0.7-kb fragment, and LP and RP for an endogenous *APIM2*; for *hap13*, LB1a and RP-h13 for a T-DNA insertion, amplifying a 0.9-kb fragment, and LP and RP-h13 for an endogenous *APIM2*; for *APIM2:3 $\times$ HA*, primers HAs and M2-as, which amplify a 1-kb fragment; for *APIM2:myc*, primers mycs and M2-as, which amplify a 0.8-kb fragment; and for *APIM1:3 $\times$ myc*, primers mycs and M1-as, which amplify a 0.8-kb fragment. Genomic DNA was isolated

using a cetyltrimethylammonium bromide-based miniscale protocol as reported previously (6). For seedling observation, seeds were germinated on solid medium [2.15 g/L MS salts, 1 g/L MES, 1% (wt/vol) sucrose (pH 5.6)] in the same growth condition as described above. Segregation of antibiotics resistance was counted on PPT-supplemented (15 mg/L) and/or KAN-supplemented (30 mg/L) medium.

**Transient Expression and in Vivo Targeting of Reporter Cargo Proteins.** Plasmid DNA was introduced into protoplasts from leaf tissues by the polyethylene glycol-mediated transformation method as described previously (7). The expression and trafficking of GFP-fused cargoes, vacuolar sorting receptor (VSR):1:HA (8), and HA: $\delta$ -adaptin (1) were examined by Western blot analysis or by confocal fluorescence microscopy at different time points.

**Western Blot Analysis and Coimmunoprecipitation.** For immunoblot analysis, protein extracts were prepared with lysis buffer [50 mM Tris (pH 7.5), 150 mM NaCl, 1 mM EDTA, 1% Triton X-100] supplemented with an EDTA-free protease inhibitors mixture (Roche Diagnostics). Antibodies of anti-GFP (rabbit; 1:1,000; Clontech), anti-binding protein (BiP) (rabbit; 1:3,000) (8), anti-tubulin (mouse; 1:5,000; Sigma-Aldrich), anti-*myc* (1:1,000; Cell Signaling), anti- $\gamma$ -adaptin (rabbit; 1:1,000), anti- $\alpha$ -adaptin (rabbit; 1:1,000) (9), or anti- $\gamma$ -subunit of coatmer complex ( $\gamma$ COP) (rabbit; 1:2,000; Agrisera), anti-VSR (rabbit; 1:1,000) (8), anti-actin (MP Bio-medicals), and peroxidase (POD)-conjugated anti-HA (1:1,000, Roche Diagnostics) were used to detect the indicated proteins. POD-conjugated secondary antibodies (1:7,000, Sigma-Aldrich) were used in all immunoblot analyses. Membranes were developed using a chemiluminescence detection system (Fusion Fx7 Imager; PEQLab) or an LAS3000 image capture system (Fujifilm).

For coimmunoprecipitation experiments, protein extracts from protoplasts were prepared in immunoprecipitation buffer [20 mM Hepes (pH 7.5), 125 mM potassium acetate, 2.5 mM magnesium acetate Mg(OAc)<sub>2</sub>, 1 mM EDTA, 1 mM EGTA, 1 mM DTT, 0.1% Triton X-100, 0.1% NP-20, 1 mM protease inhibitor mixture]. Protein extract was incubated with anti-*myc* (Cell signaling technology) or anti-T7 (Novagen) antibody at 4 °C for 3 h and followed by incubation with protein A-agarose beads (Repligen) for 1 h, except for the experiment shown in Fig. S6C, in which protein G-agarose was used instead. The beads were washed three times with immunoprecipitation buffer and subjected to Western blot analysis.

**Cell Fractionation.** Total protein was extracted from WT (Ws) and *ap1m2-1* mutant seedlings, using a fractionation buffer [20 mM Hepes (pH 7.5), 125 mM potassium acetate, 2.5 mM Mg(OAc)<sub>2</sub>, 125 mM sucrose, 1 mM EDTA, 1 mM EGTA, 1 mM DTT, 1 mM protease inhibitor mixture]. After discarding cell debris, the supernatant (approximately 15 mg) was ultracentrifuged at 195,000  $\times$  g for 1 h at 4 °C. Resulting soluble (supernatant) and membrane fractions were subjected to immunoblot analysis.

**Pull-Down Assay.** Recombinant proteins GST: $\gamma$ -adaptin and MBP:*APIM2* were purified from BL21(DE3) bacterial cells, using glutathione-agarose beads (Thermo Scientific) and amylose resin (New England Biolabs), respectively, and further incubated with protein extracts from seedlings, using pull-down buffer [20 mM Hepes (pH 7.5), 125 mM potassium acetate, 2.5 mM Mg(OAc)<sub>2</sub>, 1 mM EDTA, 1 mM EGTA, 0.1% Triton X-100, 0.1% NP-20, 1 mM PMSF, protease mixture]. The beads were washed three times with the same volume of pull-down buffer and subjected to immunoblot analysis.

**Semiquantitative RT-PCR Analysis of Transcripts.** To determine the transcript level in the mutant plants, total RNA was isolated from the 7-d-old seedlings grown on plates using an RNeasy Mini Kit (Qiagen). Total RNA (2  $\mu$ g) was reverse-transcribed using SuperScript II (Invitrogen) with random primers mixed with oligo (dT) primers. Equal amount of cDNA was used for PCR with gene specific primers listed in Table S3. PCR products were analyzed by ethidium bromide staining.

**Anti- $\gamma$ -Adaptin Antibody Generation.** To generate anti- $\gamma$ -adaptin antibody, the full-length  $\gamma$ -adaptin was expressed as a fusion protein with MBP using the pMAL-c2 vector (New England Biolabs). Recombinant MBP: $\gamma$ -adaptin was expressed in *E. coli* BL21(DE3) strain and purified using amylose resin (New England Biolabs). MBP: $\gamma$ -adaptin was used to immunize rabbits and antibody was affinity-purified using recombinant proteins. To confirm the specificity of the anti- $\gamma$ -adaptin antibody, protein extracts from protoplasts transformed with *HA: $\gamma$ -adaptin* were used in Western blot analysis (1).

**Immunohistochemistry.** Immunostaining of root tissues was performed as reported previously (10). In brief, 5-d-old seedlings were fixed in 4% (wt/vol) paraformaldehyde and labeled with the indicated antibodies. For immunofluorescence, anti-HA (mouse; 1:1,000; BAbCO), anti- $\gamma$ COP (rabbit; 1:600; Agrisera), anti-syntaxin of plants 61 (SYP61) (rabbit; 1:600; a gift from N. Raikhel, University of California Riverside, Riverside, CA), anti-clathrin heavy chain (CHC) (rabbit; 1:1,000) (11), anti-KNOLLE (rabbit; 1:4,000) (10), anti-tubulin (rat; 1:1,000; Abcam), or anti-PIN2 (rabbit, 1:600) (5) antibodies were used. As the secondary antibody, FITC-labeled anti-mouse IgG (1:600; Dianova), Cy3-labeled anti-rabbit IgG (1:600; Dianova), Alexa488-labeled anti-rabbit IgG (1:600; Invitrogen), or FITC-labeled anti-rat IgG (1:600; Dianova) were used.

**Chemical Treatment.** Five-day-old seedlings were treated with 50  $\mu$ M brefeldin A (BFA) (50 mM stock solution in 1:1 DMSO/

EtOH; Invitrogen) or 20  $\mu$ M wortmannin (20 mM stock solution in DMSO) for 1 h, followed by fixation or immediate observation. For FM4-64, 2  $\mu$ M FM4-64 was added to 5-d-old seedlings (4 mM stock solution in H<sub>2</sub>O; Invitrogen). For simultaneous treatment with BFA and FM4-64, BFA was followed by addition of FM4-64. For BFA washout, BFA-treated seedlings for 1 h were transferred to new liquid medium and fixed 30 min after the transfer. For concanamycin A (ConcA) treatment, protoplasts isolated from WT seedlings were treated at indicated concentrations (1 mM stock solution in DMSO, Invitrogen). For cycloheximide (CHX) treatment, 50  $\mu$ M CHX was added to seedlings for 1 h (50 mM stock solution in H<sub>2</sub>O; Sigma-Aldrich).

**Ultrastructure Analysis.** Root tips of 5-d-old seedlings were high-pressure-frozen in 1-hexadecene (Merck Sharp and Dohme) using a Bal-Tec HPM 010 high-pressure freezer (Balzers). Frozen samples were freeze-substituted in acetone containing 2.5% (wt/vol) osmium tetroxide (2 d at  $-90^{\circ}\text{C}$ , 6 h at  $-60^{\circ}\text{C}$ , 6 h at  $-30^{\circ}\text{C}$ , and 1 h at  $0^{\circ}\text{C}$ ) and finally embedded in epoxy resin (Roth). Ultrathin sections were stained with 2% (wt/vol) uranyl acetate in 50% ethanol for 10–20 min and lead citrate (3–5 min).

**Software.** Sequences were analyzed using Vector NTI (Invitrogen) or CLC DNA Workbench 5. Images were processed using Adobe Photoshop CS3 and Adobe Illustrator CS3. Quantification of confocal laser scanning microscopy (CLSM) images was done using Pearson and Spearman correlation coefficients (PSC) colocalization plugin of ImageJ [National Institutes of Health (NIH)] after adjusting the background level to 5 in five independently taken images according to instructions in the paper by French et al. (12). Signal intensity in immunoblot analyses were determined using ImageJ (NIH). Pixel count in live seedlings was done using Leica LAS in three or four independently taken images.

1. Lee GJ, et al. (2007) EpsinR2 interacts with clathrin, adaptor protein-3, AtVT12, and phosphatidylinositol-3-phosphate. Implications for EpsinR2 function in protein trafficking in plant cells. *Plant Physiol* 143(4):1561–1575.
2. Johnson MA, et al. (2004) Arabidopsis hapless mutations define essential gametophytic functions. *Genetics* 168(2):971–982.
3. Clough SJ, Bent AF (1998) Floral dip: A simplified method for Agrobacterium-mediated transformation of Arabidopsis thaliana. *Plant J* 16(6):735–743.
4. Lee GJ, Sohn EJ, Lee MH, Hwang I (2004) The Arabidopsis rab5 homologs rha1 and ara7 localize to the prevacuolar compartment. *Plant Cell Physiol* 45(9):1211–1220.
5. Abas L, et al. (2006) Intracellular trafficking and proteolysis of the Arabidopsis auxin-efflux facilitator PIN2 are involved in root gravitropism. *Nat Cell Biol* 8(3):249–256.
6. Assaad FF, Huet Y, Mayer U, Jürgens G (2001) The cytokinesis gene KEULE encodes a Sec1 protein that binds the syntaxin KNOLLE. *J Cell Biol* 152(3):531–543.
7. Jin JB, et al. (2001) A new dynamin-like protein, ADL6, is involved in trafficking from the trans-Golgi network to the central vacuole in Arabidopsis. *Plant Cell* 13(7):1511–1526.
8. Kim H, Park M, Kim SJ, Hwang I (2005) Actin filaments play a critical role in vacuolar trafficking at the Golgi complex in plant cells. *Plant Cell* 17(3):888–902.
9. Song K, et al. (2012) An A/ENTH domain-containing protein functions as an adaptor for clathrin-coated vesicles on the growing cell plate in Arabidopsis root cells. *Plant Physiol* 159(3):1013–1025.
10. Lauber MH, et al. (1997) The Arabidopsis KNOLLE protein is a cytokinesis-specific syntaxin. *J Cell Biol* 139(6):1485–1493.
11. Song J, Lee MH, Lee GJ, Yoo CM, Hwang I (2006) Arabidopsis EPSIN1 plays an important role in vacuolar trafficking of soluble cargo proteins in plant cells via interactions with clathrin, AP-1, VT111, and VSR1. *Plant Cell* 18(9):2258–2274.
12. French AP, Mills S, Swarup R, Bennett MJ, Pridmore TP (2008) Colocalization of fluorescent markers in confocal microscope images of plant cells. *Nat Protoc* 3(4):619–628.



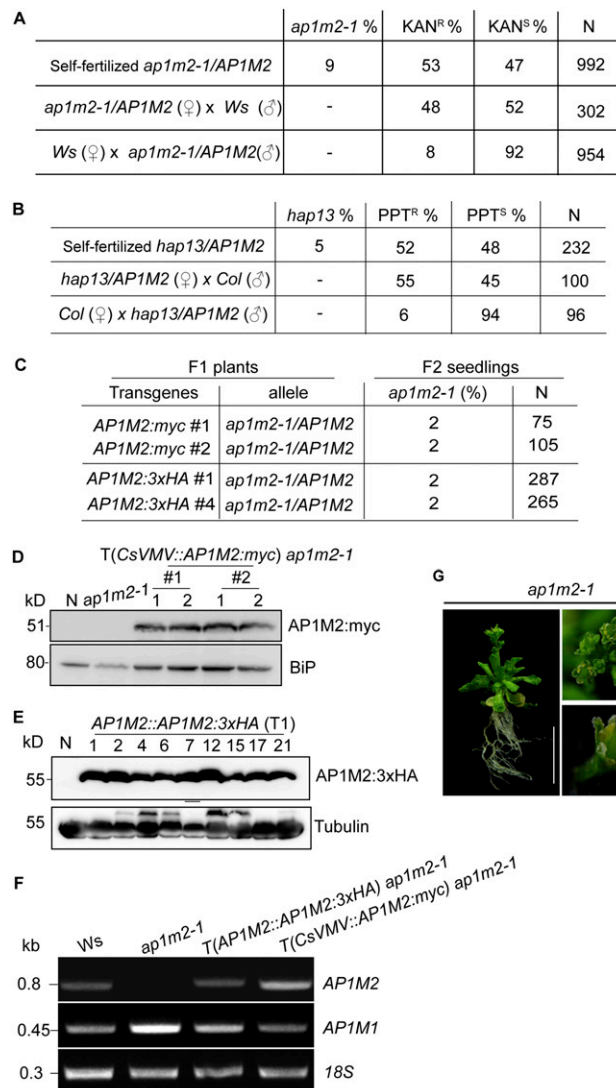

**Fig. S2.** Genetic analysis of T-DNA insertional *AP1M2* mutants and phenotype of mature *ap1m2-1* mutant grown in a closed container. (A and B) Reciprocal crosses of *ap1m2* heterozygotes with the respective WT (*Ws*, Wassilewskija or *Col*, Columbia) revealed reduced transmission of *ap1m2* mutant alleles *ap1m2-1* [KAN resistance (KAN<sup>R</sup>)] (A) or *hap13* [PPT resistance (PPT<sup>R</sup>)] (B) through the pollen, resulting in only 9% or 5% *ap1m2* homozygous seedlings upon selfing of heterozygotes, respectively. N, total number of seedlings analyzed. (C) Complementation tests. Transgenic plants each carrying a different single T-DNA insertion of CsVMV::AP1M2::myc (Hyg<sup>R</sup>) or AP1M2::AP1M2::3xHA (PPT<sup>R</sup>) were crossed with *ap1m2-1* heterozygous plants. F2 progenies (N, number of seedlings) were analyzed for the phenotypic segregation and genotyped. Note that 2% *ap1m2-1* homozygous seedlings corresponds to the expected value if 75% of approximately 9% *ap1m2-1* homozygous seedlings from selfed *ap1m2-1* heterozygous plants are rescued by the transgene (A). R, resistant; S, sensitive. (D and E) Immunoblot analysis of CsVMV::AP1M2::myc and AP1M2::AP1M2::3xHA plants. (D) Two independent lines of CsVMV::AP1M2::myc harboring a single T-DNA insertion were crossed with *ap1m2-1* heterozygous plants. Total protein of nontransformed (N), *ap1m2-1* homozygous, and rescued seedlings was subjected to immunoblot analysis with anti-myc or anti-BiP antiserum. T, transgene. (E) Total protein of nontransformed (N) and T1 plants harboring AP1M2::AP1M2::3xHA was subjected to immunoblot analysis with anti-HA or anti-tubulin antiserum. Plants bearing a single T-DNA insertion (#1 and #4) were crossed with the *ap1m2-1* heterozygous plants for complementation test (C). Molecular mass markers are shown at the left. (F) Semiquantitative RT-PCR analysis to compare the level of transgenically expressed epitope-tagged *AP1M2* in rescued mutant lines to that of endogenous *AP1M2* in WT. Note that the level of *AP1M2::3xHA* and *AP1M2::myc* is comparable to that of WT. *18S rRNA* (*18S*) was used as loading control. Molecular mass markers are shown at the left. (G) Phenotype of mature *ap1m2-1* mutant grown in a closed container. Note that the mutant presents ill-developed anthers. (Scale bar: 1 cm.)

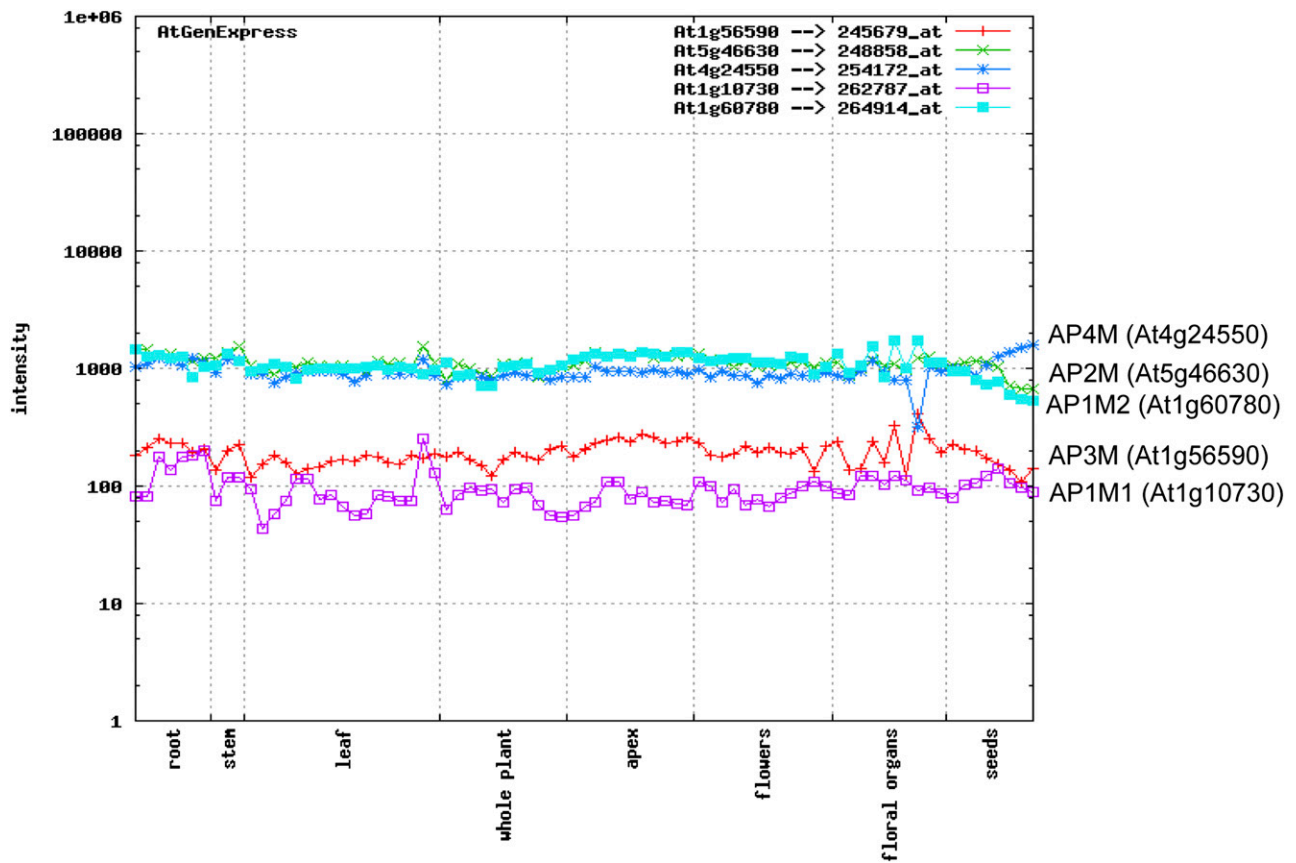

Fig. S3. Expression profile of the *Arabidopsis* mu adaptins. Expression levels of AP1M1 (magenta), AP1M2 (turquoise), AP2M (green), AP3M (red), and AP4M (blue) were compared using the AtGenExpress Visualization Tool ([www.weigelworld.org/resources/microarray/AtGenExpress](http://www.weigelworld.org/resources/microarray/AtGenExpress)) (1).

1. Schmid M, et al. (2005) A gene expression map of *Arabidopsis thaliana* development. *Nat Genet* 37(5):501–506.

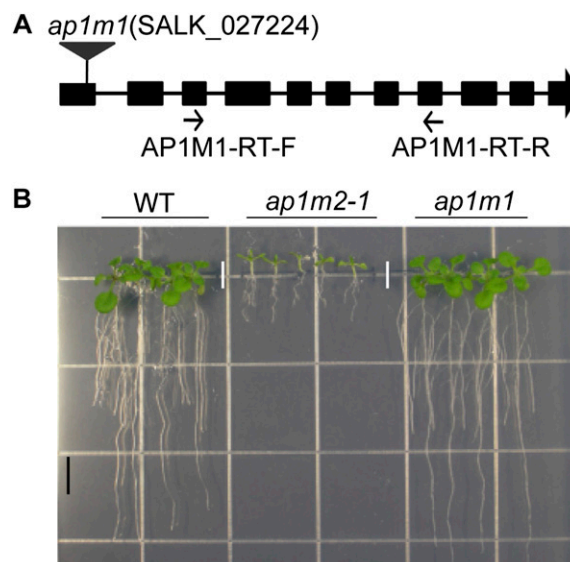

Fig. S4. T-DNA insertion *AP1M1* mutant does not show any discernible morphological change. (A) Diagram of the T-DNA insertion in *AP1M1*, *ap1m1* (SALK\_027224). Primers used in Fig. 1E are indicated. (B) Images of *ap1m1* homozygous seedlings grown on an MS plate for 7 d. Note that seedlings of the *ap1m1* mutant look normal, in contrast to the *ap1m2-1* mutant. (Scale bar: 1 cm.)

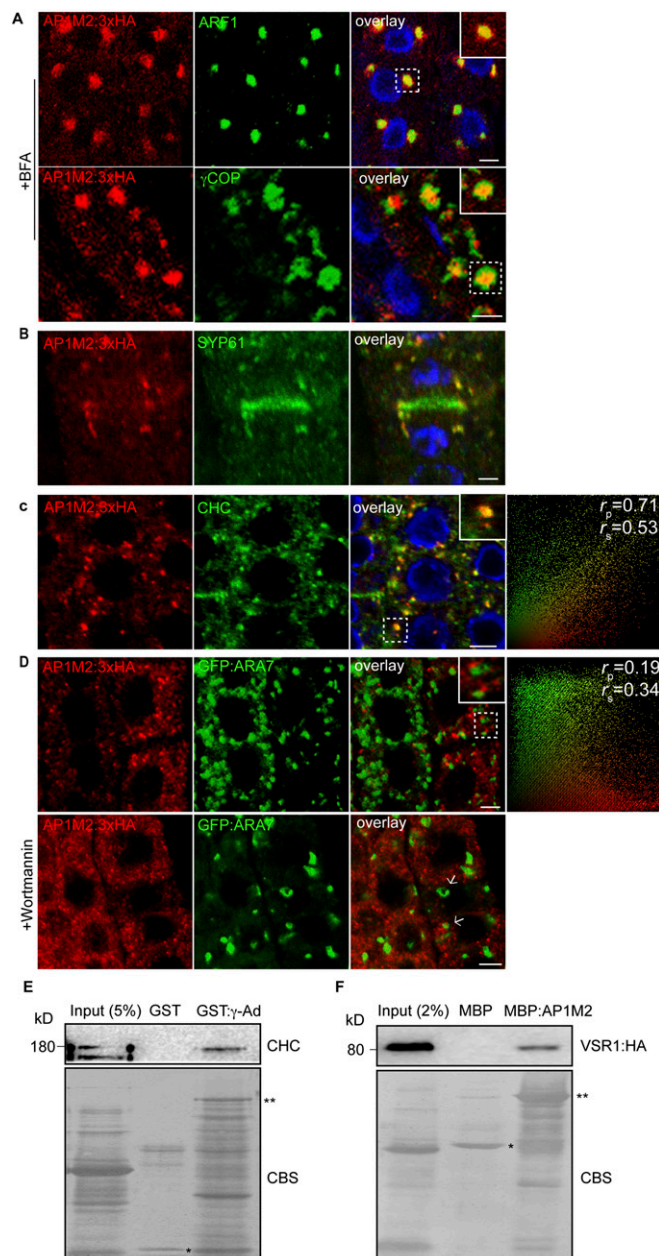

**Fig. S5.** Localization of tagged AP1M2 in seedling roots and the interaction of  $\gamma$ -adaptin-containing AP1 complex with clathrin and VSR. (A) After BFA treatment, AP1M2:3xHA in *ap1m2-1* homozygous background was counterstained with anti-ARF1 (Upper) or anti- $\gamma$ COP (Lower) antiserum. Note that AP1M2:3xHA colocalized with ARF1 in endosomal BFA compartments surrounded by  $\gamma$ COP-positive Golgi stacks. (B and C) AP1M2:3xHA in *ap1m2-1* homozygous background was counterstained with anti-SYP61 (B) or anti-CHC (C) antiserum. Note that the tagged AP1M2 does not accumulate at the cell plate, which is positively labeled with anti-SYP61 antiserum (B). Note partial colocalization of AP1M2:3xHA with clathrin (C). (D) AP1M2:3xHA and the multivesicular body (MVB) marker GFP:ARA7/RAB-F2b were examined for colocalization. AP1M2:3xHA was detected by immunostaining with anti-HA antibody and GFP signals of GFP:ARA7/RAB-F2b were observed directly. AP1M2:3xHA-positive endosomes were insensitive to wortmannin, in contrast to the swollen ARA7/RabF2b-labeled prevacuolar compartment/multivesicular body/late endosome (PVC/MVB/LE) (white arrows). The extent of colocalization was quantified using the linear Pearson correlation coefficient ( $r_p$ ) and the nonlinear Spearman rank correlation coefficient ( $r_s$ ), and the resulting scatterplot images are shown on the right (C and D). A value of 1.0 means complete colocalization of two fluorescent signals. Note partial colocalization of AP1M2:3xHA with clathrin, as quantified by  $r_p/r_s = 0.71/0.53$  and no localization of AP1M2:3xHA at the PVC/MVB labeled with GFP:ARA7/RAB-F2b, as indicated by  $r_p/r_s = 0.19/0.34$ . Insets show boxed areas at higher magnification. (Scale bars: 5  $\mu$ m.) (E) Purified recombinant GST or GST: $\gamma$ -adaptin protein was precipitated with glutathione beads after incubation with plant extracts from WT seedlings and followed by immunoblot analysis. Note that CHC is detected in the precipitate but not in the control precipitate done with GST alone. The Coomassie-stained membrane (CBS) showed bands of GST (asterisk) and GST: $\gamma$ -adaptin (double asterisks). (F) Pull down of HA-tagged VSR1 from protoplasts, using recombinant MBP fused to AP1M2; MBP alone was used as control. The CBS showed bands of MBP (asterisk) and MBP:AP1M2 (double asterisks). Molecular mass markers are indicated in kilodaltons (kDa).

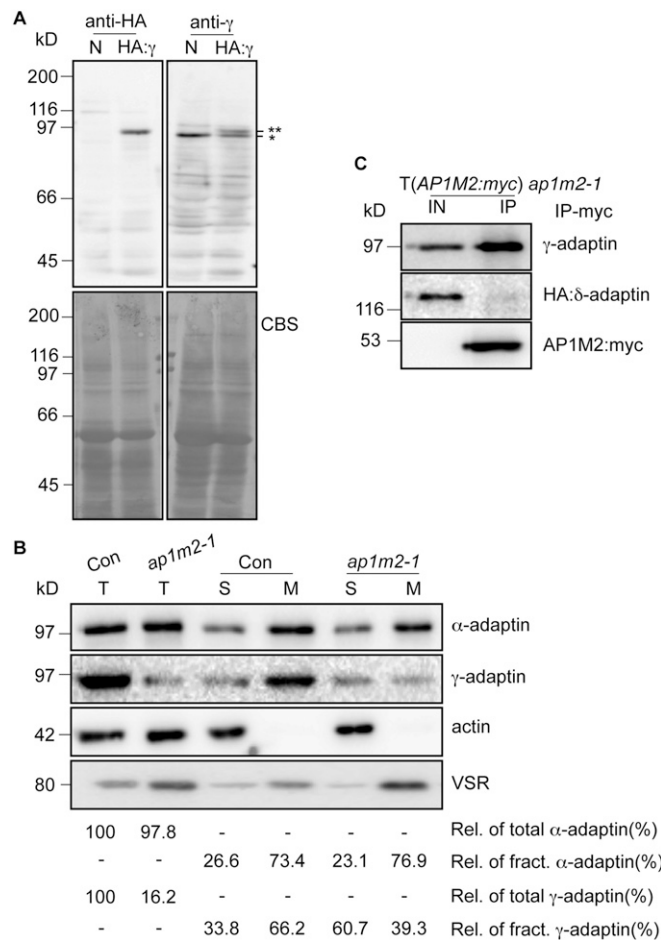

**Fig. S6.** Specificity determination of anti- $\gamma$ -adaplin antiserum and no interaction of AP1M2 with  $\delta$ -adaplin. (A) Total protein extracts from protoplasts transformed with *HA: $\gamma$ -adaplin* (HA: $\gamma$ ) were analyzed by immunoblotting using anti-HA antibody and anti- $\gamma$ -adaplin antiserum. N, nontransformed protoplasts. Asterisk, endogenous  $\gamma$ -adaplin; double asterisks, transiently expressed HA: $\gamma$ -adaplin. A, Lower shows the CBS. (B) Fractionation analysis. Total protein was extracted from WT (Con) or *ap1m2-1* mutant seedlings, followed by microultracentrifugation. Note that total protein level of  $\gamma$ -adaplin in *ap1m2-1* mutant is highly reduced by approximately 80% compared with the WT and that less  $\gamma$ -adaplin is detected in the membrane (M) fraction of the *ap1m2-1* mutant compared with WT. Actin and VSR were detected as controls of soluble (S) and membrane fractions, respectively. Rel. of adaptins, relative signal intensity: total (T) signal of *ap1m2-1* is expressed as percentage of control (Con, WT; 100%). The relative signal intensity of soluble and membrane fraction in each case is expressed as percentage of the total signal. (C) Protein extract [input (IN)] from rescued protoplasts (*CsVMV::AP1M2::myc* in *ap1m2-1* mutant background) that had been transformed with *35S::HA: $\delta$ -adaplin* was subjected to immunoprecipitation (IP) with anti-myc antibody and the immunoprecipitate was analyzed by immunoblotting using anti-HA, anti-myc, or anti- $\gamma$ -adaplin antiserum. Note that HA: $\delta$ -adaplin is not immunoprecipitated with AP1M2, in contrast to  $\gamma$ -adaplin. Molecular mass markers are indicated in kilodaltons (kDa).

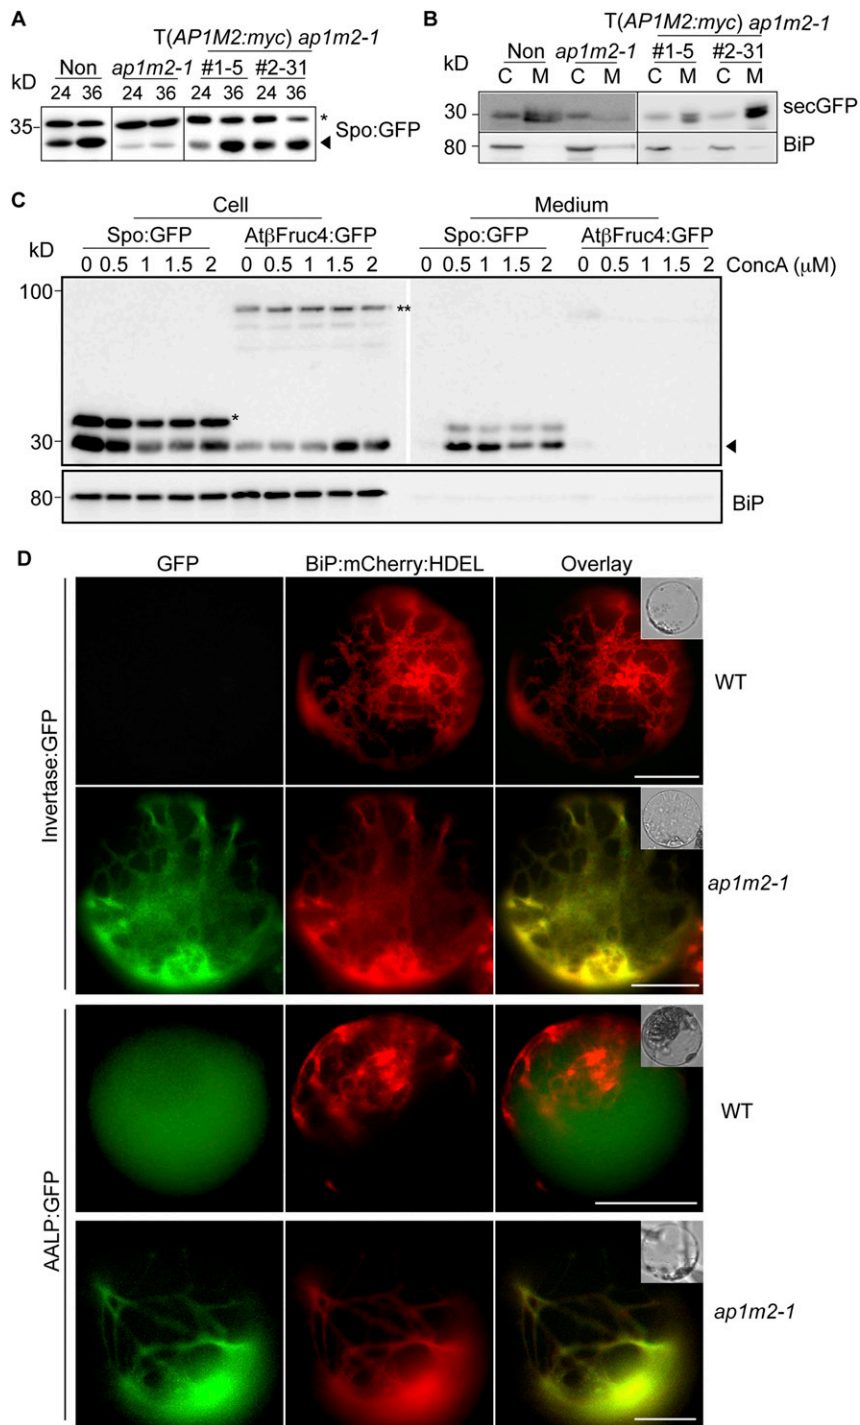

**Fig. S7.** Vacuolar and secretory pathways are impaired in the *ap1m2* mutants. (A) Trafficking of vacuolar cargo. Protoplasts from nontransformed, *ap1m2-1*, and two independent rescued plants (*CsVMV::AP1M2::myc* in *ap1m2-1*) were transformed with *Sporamin::GFP* (*Spo::GFP*). At 24 or 36 h after transformation, total protein extracts from protoplasts were subjected to immunoblot analysis with anti-GFP antiserum. Asterisk, full-length *Spo::GFP*; closed triangle, processed *Spo::GFP*. (B) Trafficking of secretory cargo. Secretory GFP (*secGFP*) was transformed into protoplasts from the indicated plants. At 24 h after transformation, total protein extracts from protoplasts (C) and the incubation medium (M) were subjected to immunoblot analysis with anti-GFP antiserum. BiP was used as a control for nonspecific leaking of cellular proteins. (C) Protoplasts transformed with *Spo::GFP* or *AtβFructosidase4::GFP* (*AtβFruc4::GFP*) were treated with ConcA at the indicated concentrations. At 24 h after transformation, total protein extracts from protoplasts were subjected to immunoblot analysis with anti-GFP antiserum. Asterisk, full-length *Spo::GFP*; double asterisks, full length *AtβFruc4::GFP*; closed triangle, processed forms of *AtβFruc4::GFP* and *Spo::GFP*. Note that ConcA treatment inhibits the delivery of *Spo::GFP*, but not of *AtβFruc4::GFP*, to the vacuole. Both precursor and mature *Spo::GFP* are secreted from ConcA-treated protoplasts into the medium. Endoplasmic reticulum (ER)-localized BiP was used as control for intact cells. (D) Localization of soluble vacuolar and secretory proteins in *ap1m2-1* mutant protoplasts. Protoplasts from WT or *ap1m2-1* mutant plants were transformed with the indicated constructs and subcellular localization of the proteins was examined. Note that AALP:GFP and invertase:GFP accumulate in the ER, as indicated by their colocalization with BiP:mCherry:HDEL in the *ap1m2-1* protoplasts. (Scale bars: 10 μm.)
